# Supplementary material for: Blockade of α4 Integrin Signaling Ameliorates the Metabolic Consequences of High-Fat Diet–Induced Obesity
Source: Oxford University Press journal article supplement (doi:10.2337/db07-1751), 2008-04-22
Supplement: db071751-sup-supps.doc [file db071751-sup-supps.doc]

*
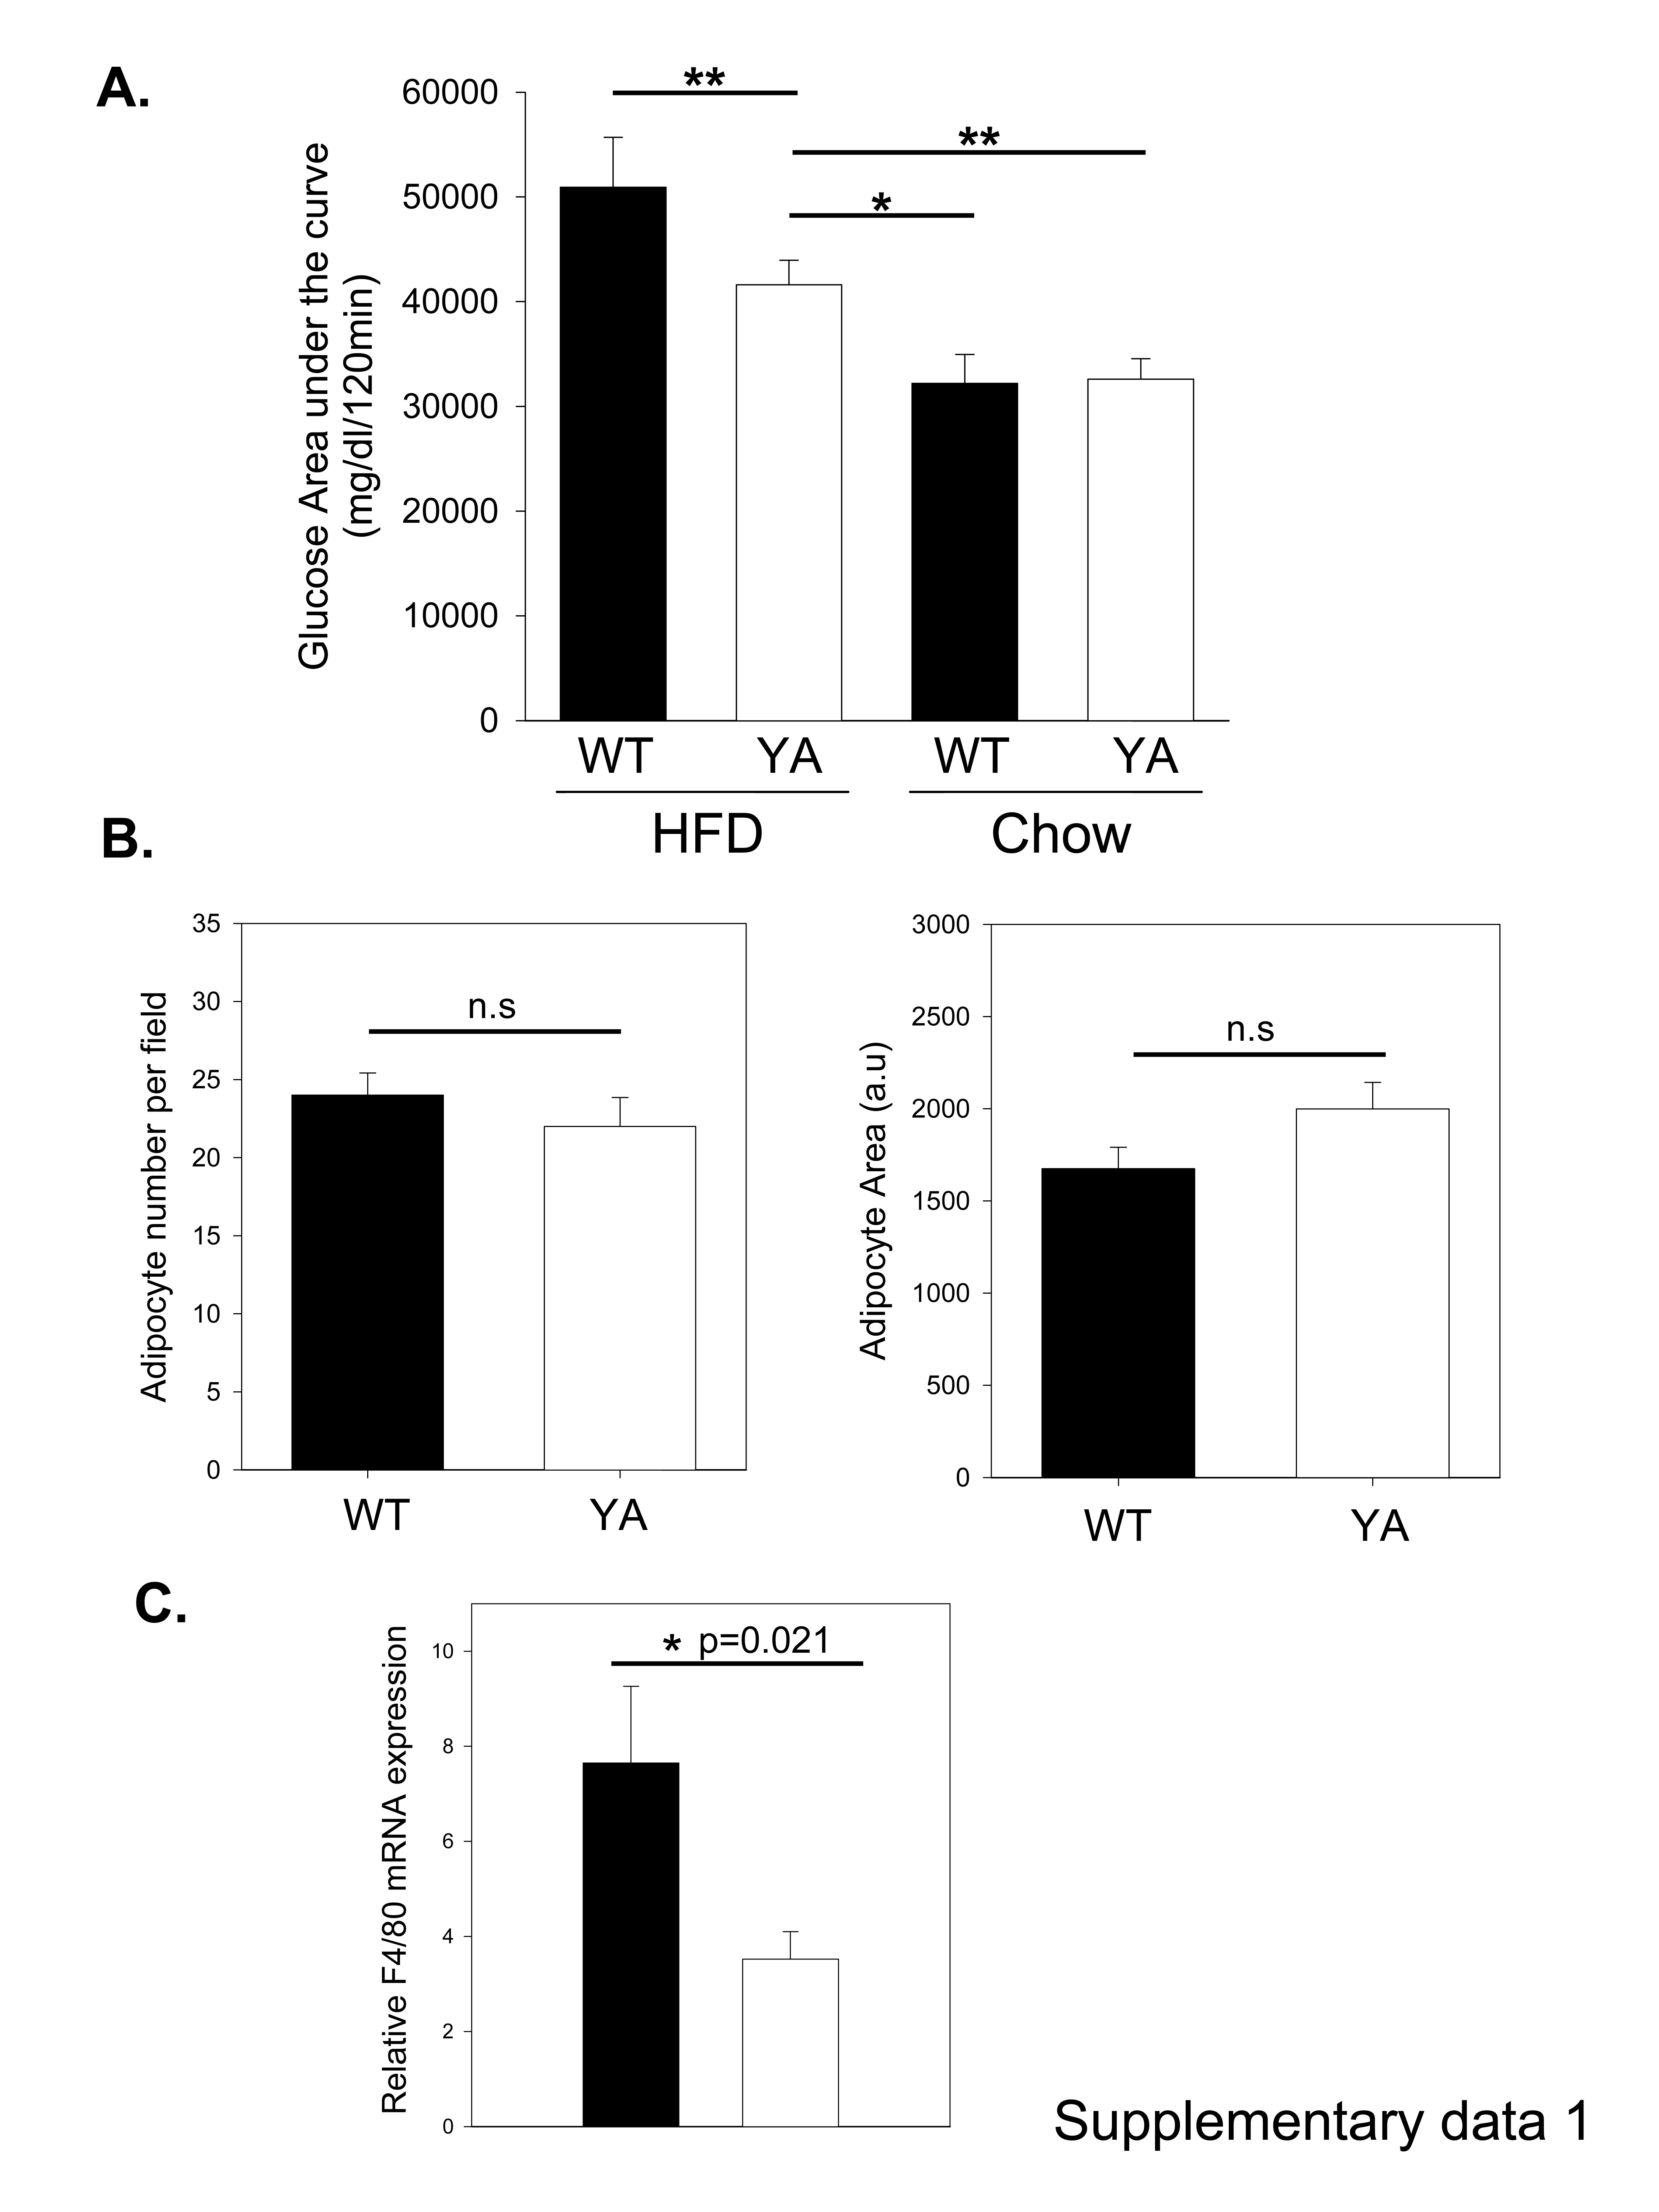
*

***A.*** *α4(Y991A) mutation protects mice against the development of HFD-induced glucose intolerance.* *In vivo* glucose homeostasis was assessed by glucose tolerance testing (GTT) in WT and α4(Y991A) mice on high fat diet (HFD) and normal chow (CHOW). Data from Fig. 1A are represented as total area-under-the-curve (AUC) as for insulin levels (Fig. 1B)*.* ***B****. Comparison of adipocyte cell size and cell number in WT and α4(Y991A) mice.* H&E images of white adipose tissue isolated from WT and α4(Y991A) were used to measure adipocyte cell size and cell number (ImageJ software, NIH freeware). There was no statistical difference between genotype. The results shown are mean ±SEM. Sections of 3 mice per group and 5 different tissue areas per mouse were analyzed. n.s not significant. C. *Reduction in F4/80 mRNA in WAT from fat-fed α4(Y991A) compared to WT mice.* Levels of F4/80 mRNA were determined *in vivo* in epididymal white adipose tissue (WAT) from WT and α4(Y991A) mice by using real-time RT-PCR. The data are normalized to the expression of V-ATPase. Values are mean ± SEM. p value is also indicated.

*
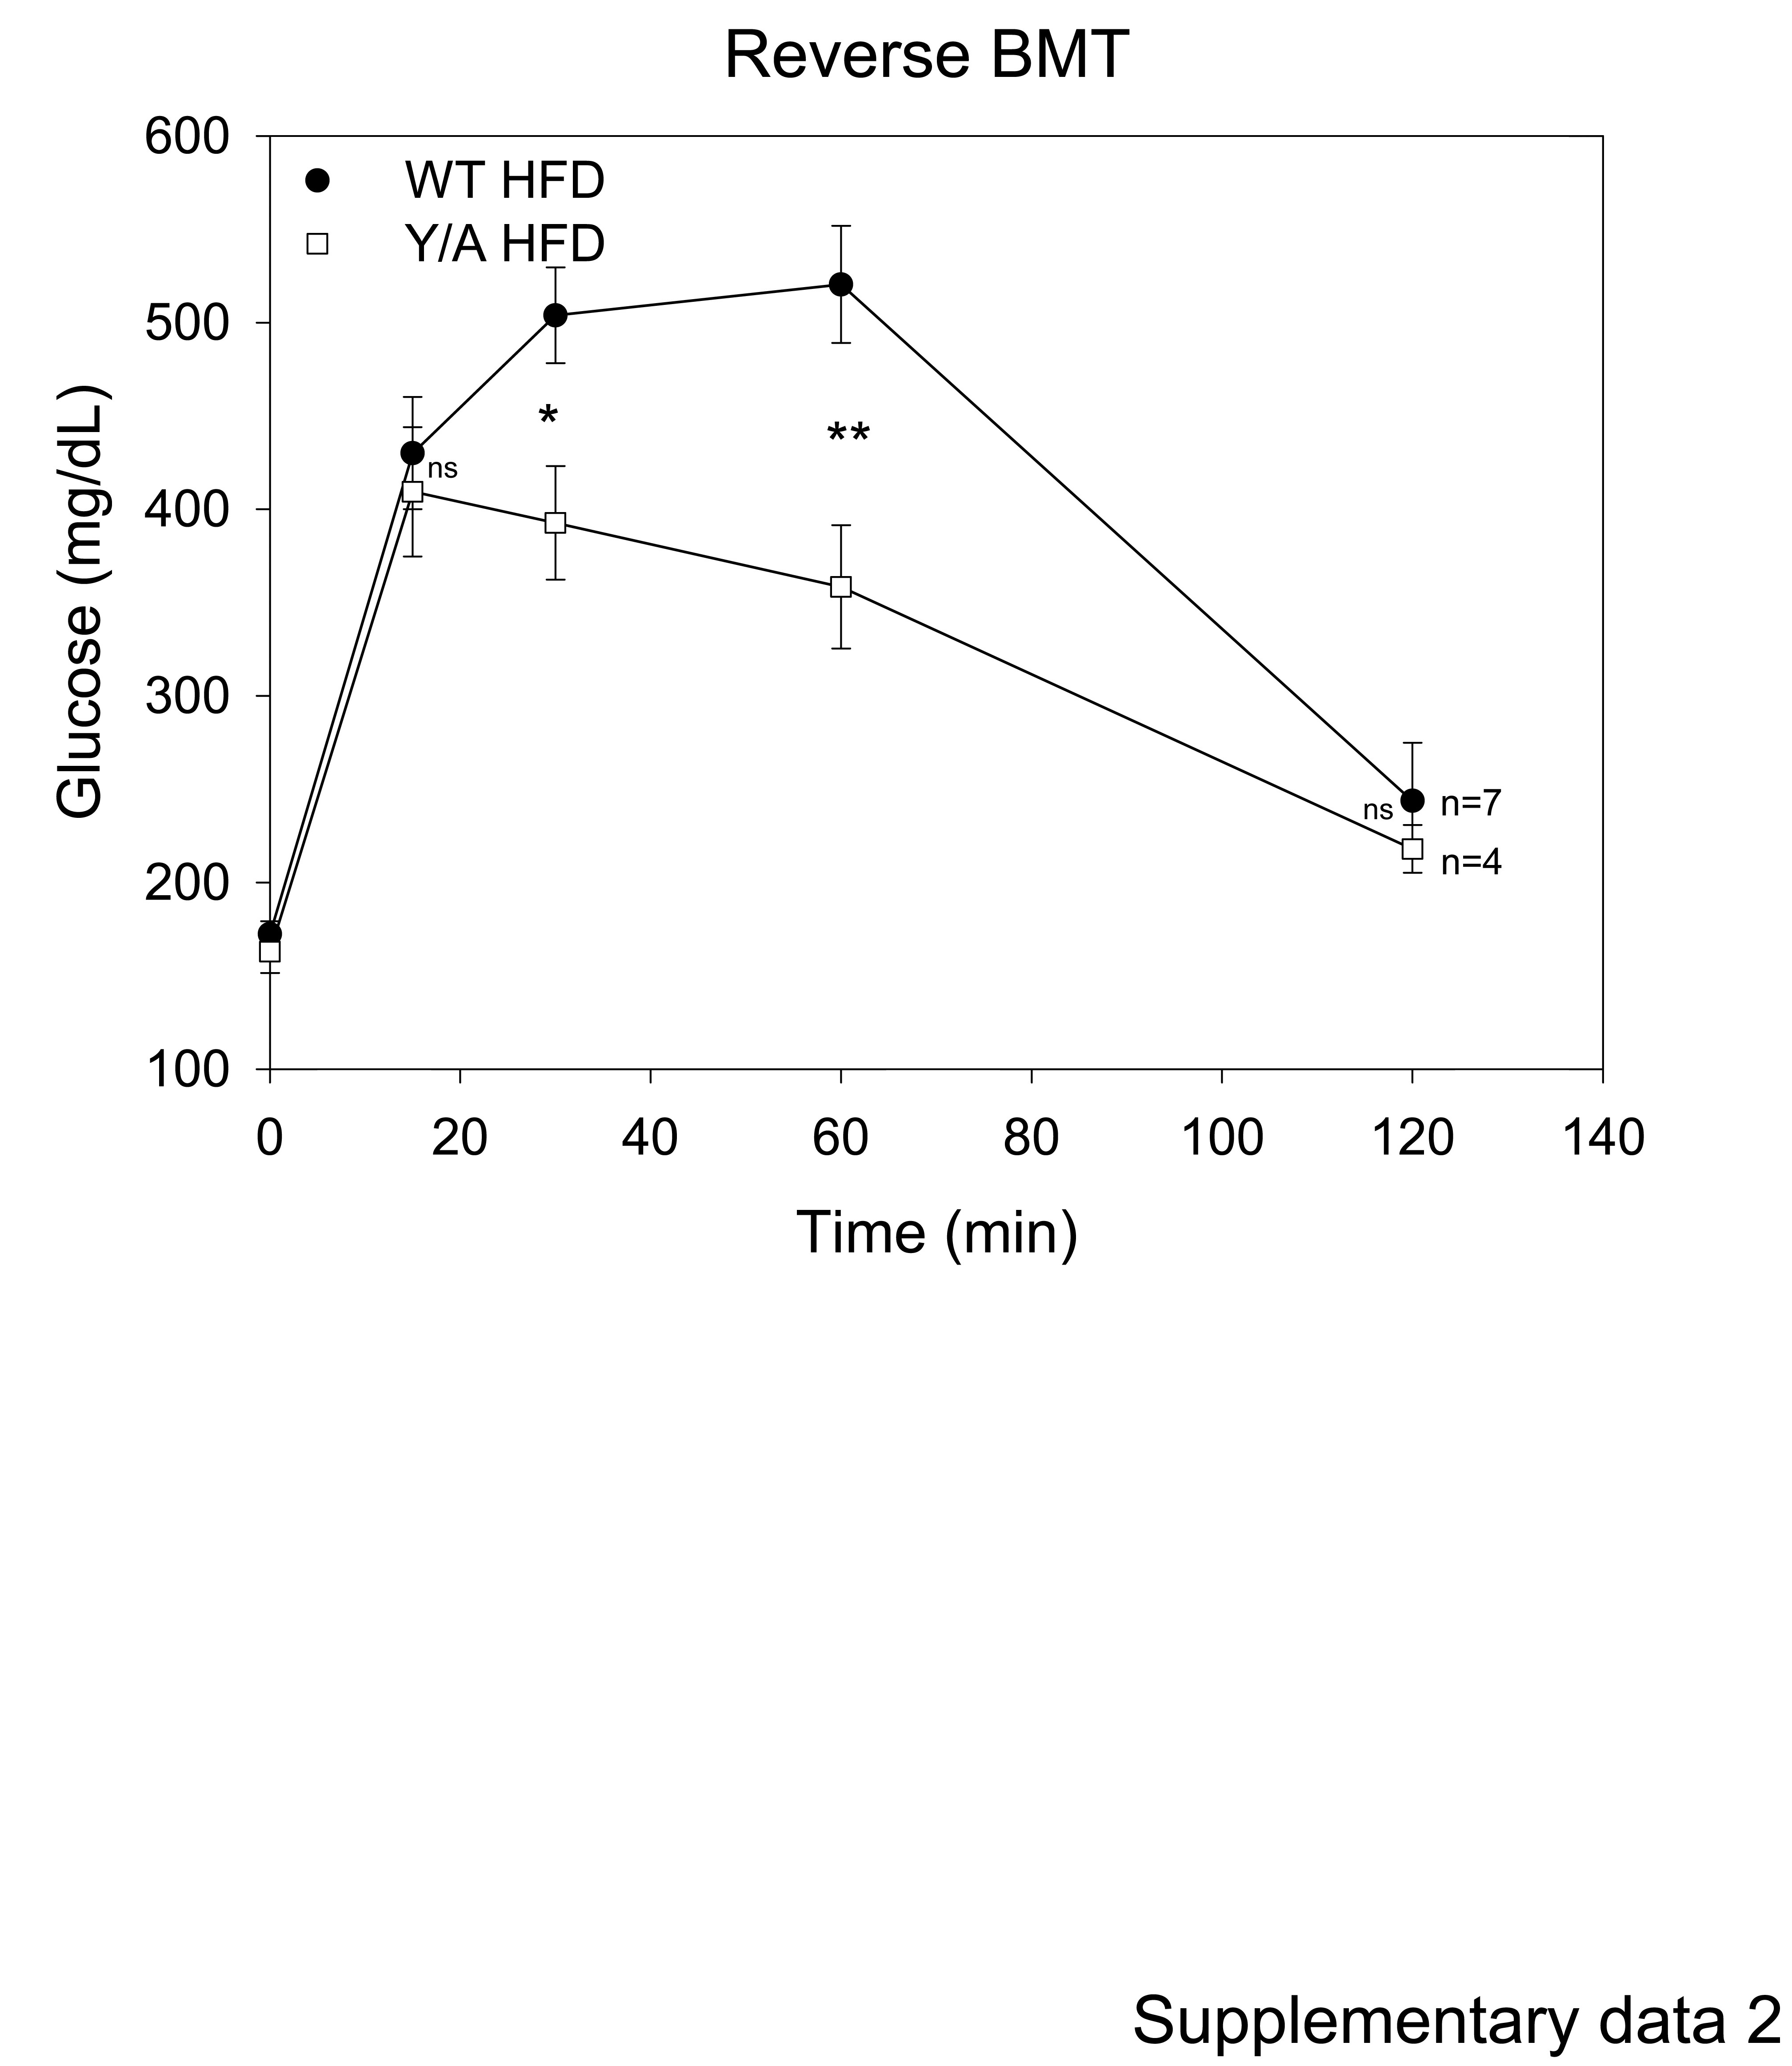
*

*WT bone marrow forces the development of HFD-induced glucose intolerance in α4(Y991A) mice. In vivo* glucose homeostasis was assessed by glucose tolerance testing (GTT) in fat-fed α4(Y991A) animals receiving either WT (closed circles) or α4(Y991A) (open squares) bone marrow on high fat diet. The results shown are mean ±SEM for each time point. Number (n) of mice used in this study is also indicated. *p < 0.05; **p < 0.01, ns. not significant.

*Supplementary methods*

*Glucose and insulin tolerance test.* For glucose and insulin tolerance tests, animals were fasted 5 h and a basal blood sample was taken. Animals were injected intra-peritoneally with 200 µl glucose (1 g/kg, 50% Dextrose solution FLTP additive-Hospira) or insulin (0.75 U/kg for chow diet and 0.85 U/kg for HFD; Novolin R, Novo-Nordisk, Copenhagen). Blood samples were taken at 15, 30, 45, 60, 90, and 120 min or 10, 20, 30, 45, 60, 90, 120 min; respectively for the determination of blood glucose concentration.

*RNA isolation and RT-PCR.* Total RNA was isolated from WAT using RNeasy Lipid Tissue Kit(Qiagen). For real-time PCR, cDNA was prepared from1 µg of total RNA (Perkin–Elmer). Real-time PCR were performed in an iCycler (Bio-Rad) usingspecific primer sets (see table). mRNA was quantified after normalization to V-ATPase. Separatecontrol experiments demonstrated that the efficiencies of targetand reference amplification were equal. PCR specificity was verified by melt-curve analysis ofthe final products directly in the iCycler and by gelelectrophoresis.

| *Gene* | *Primers* |
| --- | --- |
| MCP-1 | Forward: AGCACCAGCCAACTCTCAC  Reverse: TCTGGACCCATTCCTTCTTG |
| IL-6 | Forward: GACAACCACGGCCTTCCCTA  Reverse: GCCTCCGACTTGTGAAGTGGT |
| TNF | Forward: GGCAGGTCTACTTTGGAGTCATTGC  Reverse: ACATTCGAGGCTCCAGTGAATTCGG |
| Leptin | Forward: TGCTGCAGATAGCCAATGAC  Reverse: GAGTAGAGTGAGGCTTCCAGGA |
| PAI-1 | Forward: TCAGCCCTTGCTTGCCTCAT  Reverse: GCATAGCCAGCACCGAGGA |
| cyclophilin | Forward: ATCTGCACTGCCAAGACTGA  Reverse: TTTCACCTTCCCAAAGACCA |
| V-ATPase | Forward: TGATGCCATGTGTCCTATCC  Reverse: CAGCTCTGTGCCGAAAGAGT |
